# Supplementary material
Source: PubMed Central journal article supplement (PMC7903470)
Supplement: NIHMS1666533-supplement-1.pdf [file NIHMS1666533-supplement-1.pdf]

## SUPPLEMENTAL MATERIALS

Supplemental Table 1: Regions selected from Harvard Oxford Cortical and Subcortical Atlases to create imaging masks.

| <b><u>Cortical Atlas:</u></b>                                 | <b><u>Index #</u></b> | <b><u>Subcortical Atlas:</u></b> | <b><u>Index #</u></b> |
|---------------------------------------------------------------|-----------------------|----------------------------------|-----------------------|
| Frontal Pole                                                  | 0                     | Left/Right Thalamus              | 3, 14                 |
| Insular Cortex                                                | 1                     | Left/Right Caudate               | 4, 15                 |
| Superior Frontal Gyrus                                        | 2                     | Left/Right Putamen               | 5, 16                 |
| Middle Frontal Gyrus                                          | 3                     | Left/Right Pallidum              | 6, 17                 |
| Inferior Frontal Gyrus (pars triangularis & pars opercularis) | 4, 5                  | Left/Right Hippocampus           | 8, 18                 |
| Precentral Gyrus                                              | 6                     | Left/Right Amygdala              | 9, 19                 |
| Temporal Pole                                                 | 7                     |                                  |                       |
| Superior Temporal Gyrus (anterior division)                   | 8                     |                                  |                       |
| Middle Temporal Gyrus (anterior division)                     | 10                    |                                  |                       |
| Inferior Temporal Gyrus (anterior division)                   | 13                    |                                  |                       |
| Postcentral Gyrus                                             | 16                    |                                  |                       |
| Frontal Medial Cortex                                         | 24                    |                                  |                       |
| Cingulate Gyrus (anterior & posterior divisions)              | 28, 29                |                                  |                       |
| Precuneous Cortex                                             | 30                    |                                  |                       |
| Frontal Orbital Cortex                                        | 32                    |                                  |                       |
| Temporal Fusiform Cortex (anterior division)                  | 36                    |                                  |                       |
| Frontal Operculum Cortex                                      | 40                    |                                  |                       |

\*All regions thresholded at 50% probability of being that region across populations.
